# Supplementary material
Source: ML conference proceedings conference paper supplement (https://aclanthology.org/D19-1353)
Supplement: Attachment [file D19-1353.Attachment.zip]

## **A Appendix**

### **A.1 Evaluation**

This section provides performance tables that did not fit in the main submission. Tables begin on the next page.

| Language | BPE   | 25000 | 50000 | 75000 | 100000 | 125000 | 150000 | 175000 | 200000 |
|----------|-------|-------|-------|-------|--------|--------|--------|--------|--------|
| Czech    | 16000 | 18.70 | 23.90 | 25.80 | 27.40  | 28.70  | 29.40  | 31.00  | 30.70  |
| Czech    | 32000 | 17.50 | 23.50 | 26.50 | 28.50  | 29.40  | 30.20  | 31.20  | 31.50  |
| German   | 16000 | 20.00 | 24.80 | 26.70 | 28.90  | 28.80  | 29.50  | 30.60  | 31.20  |
| German   | 32000 | 18.50 | 23.90 | 27.00 | 28.40  | 29.80  | 30.00  | 31.00  | 32.00  |

Table 1: MT test set lowercase BLEU by language, joint BPE merge operations, and number of training sentences.

| Lang.  | Collection | Model  | BPE   | 25000 | 50000 | 75000 | 100000 | 125000 | 150000 | 175000 | 200000 |
|--------|------------|--------|-------|-------|-------|-------|--------|--------|--------|--------|--------|
| Czech  | Europarl   | BM25   | 16000 | 0.316 | 0.395 | 0.416 | 0.433  | 0.457  | 0.453  | 0.467  | 0.477  |
| Czech  | Europarl   | BM25   | 32000 | 0.306 | 0.406 | 0.444 | 0.460  | 0.476  | 0.482  | 0.491  | 0.498  |
| Czech  | Wikipedia  | BM25   | 16000 | 0.218 | 0.303 | 0.327 | 0.340  | 0.356  | 0.359  | 0.375  | 0.374  |
| Czech  | Wikipedia  | BM25   | 32000 | 0.141 | 0.247 | 0.294 | 0.314  | 0.333  | 0.338  | 0.350  | 0.349  |
| Czech  | Wikipedia  | Neural | 16000 | 0.061 | 0.084 | 0.092 | 0.098  | 0.104  | 0.112  | 0.116  | 0.114  |
| Czech  | Wikipedia  | Neural | 32000 | 0.042 | 0.071 | 0.086 | 0.093  | 0.099  | 0.101  | 0.107  | 0.112  |
| German | Europarl   | BM25   | 16000 | 0.337 | 0.416 | 0.438 | 0.470  | 0.461  | 0.481  | 0.483  | 0.500  |
| German | Europarl   | BM25   | 32000 | 0.319 | 0.414 | 0.453 | 0.475  | 0.494  | 0.503  | 0.500  | 0.518  |
| German | Wikipedia  | BM25   | 16000 | 0.301 | 0.365 | 0.384 | 0.396  | 0.400  | 0.408  | 0.413  | 0.416  |
| German | Wikipedia  | BM25   | 32000 | 0.185 | 0.310 | 0.354 | 0.374  | 0.390  | 0.392  | 0.397  | 0.408  |
| German | Wikipedia  | Neural | 16000 | 0.080 | 0.103 | 0.113 | 0.119  | 0.115  | 0.121  | 0.125  | 0.121  |
| German | Wikipedia  | Neural | 32000 | 0.056 | 0.082 | 0.103 | 0.108  | 0.111  | 0.115  | 0.118  | 0.123  |

Table 2: IR test set RBO by language, collection, IR model, joint BPE merge operations, and number of training sentences.

| Lang.  | Collection | Model  | BPE   | 25000 | 50000 | 75000 | 100000 | 125000 | 150000 | 175000 | 200000 |
|--------|------------|--------|-------|-------|-------|-------|--------|--------|--------|--------|--------|
| Czech  | Europarl   | BM25   | 16000 | 0.254 | 0.337 | 0.357 | 0.376  | 0.391  | 0.395  | 0.405  | 0.411  |
| Czech  | Europarl   | BM25   | 32000 | 0.240 | 0.332 | 0.377 | 0.389  | 0.404  | 0.407  | 0.420  | 0.424  |
| Czech  | Wikipedia  | BM25   | 16000 | 0.434 | 0.585 | 0.616 | 0.642  | 0.666  | 0.675  | 0.699  | 0.692  |
| Czech  | Wikipedia  | BM25   | 32000 | 0.278 | 0.498 | 0.573 | 0.613  | 0.634  | 0.642  | 0.661  | 0.661  |
| Czech  | Wikipedia  | Neural | 16000 | 0.045 | 0.063 | 0.072 | 0.083  | 0.086  | 0.091  | 0.090  | 0.091  |
| Czech  | Wikipedia  | Neural | 32000 | 0.028 | 0.056 | 0.069 | 0.069  | 0.078  | 0.079  | 0.083  | 0.082  |
| German | Europarl   | BM25   | 16000 | 0.273 | 0.350 | 0.379 | 0.399  | 0.396  | 0.413  | 0.419  | 0.430  |
| German | Europarl   | BM25   | 32000 | 0.250 | 0.352 | 0.396 | 0.412  | 0.422  | 0.435  | 0.433  | 0.444  |
| German | Wikipedia  | BM25   | 16000 | 0.606 | 0.702 | 0.732 | 0.752  | 0.753  | 0.774  | 0.775  | 0.779  |
| German | Wikipedia  | BM25   | 32000 | 0.380 | 0.614 | 0.689 | 0.717  | 0.742  | 0.747  | 0.758  | 0.772  |
| German | Wikipedia  | Neural | 16000 | 0.068 | 0.091 | 0.101 | 0.105  | 0.094  | 0.106  | 0.107  | 0.108  |
| German | Wikipedia  | Neural | 32000 | 0.038 | 0.062 | 0.090 | 0.096  | 0.098  | 0.095  | 0.105  | 0.107  |

Table 3: IR test set MAP by language, collection, IR model, joint BPE merge operations, and number of training sentences.
